# Supplementary material for: Process evaluation of a programme to empower community nurse leadership
Source: PubMed Central journal article supplement (PMC8273989; doi:10.1186/s12912-021-00650-y), 2021-07-12
Supplement: 12912_2021_650_MOESM1_ESM.pdf [file 12912_2021_650_MOESM1_ESM.pdf]

1 Additional files

2 **Additional file 1. Topic list with examples of the questions of the interviews**

| <b>Topics</b>              | <b>Examples of questions from the interviews with community nurses</b>                                                                                                                                                     |
|----------------------------|----------------------------------------------------------------------------------------------------------------------------------------------------------------------------------------------------------------------------|
| Fidelity                   | <ul style="list-style-type: none"> <li>• Have you executed the strategies from the implementation plan to implement evidence for encouraging functional activities?<br/>If yes, can you amplify your answer?</li> </ul>    |
| Dose delivered             | <ul style="list-style-type: none"> <li>• Were you able to open the systematic approach via the e-learning programme?<br/>If yes, can you name some of the depicted content?</li> </ul>                                     |
| Dose received exposure     | <ul style="list-style-type: none"> <li>• Did you use the background theory of the systematic approach via the e-learning programme?<br/>If yes, can you amplify your answer?</li> </ul>                                    |
| Dose received satisfaction | <ul style="list-style-type: none"> <li>• How satisfied were you with the NitL programme?<br/>Can you amplify your answer?</li> </ul>                                                                                       |
| Context                    | <ul style="list-style-type: none"> <li>• Did you experience any facilitators in developing the implementation plan?<br/>If yes, what were these facilitators?</li> </ul>                                                   |
| <b>Topics</b>              | <b>Examples of questions from the focus groups with team members</b>                                                                                                                                                       |
| Fidelity                   | <ul style="list-style-type: none"> <li>• Did the community nurse of your team enable you to change your practice in encouraging functional activities of older adults?<br/>If yes, can you amplify your answer?</li> </ul> |
| Dose received satisfaction | <ul style="list-style-type: none"> <li>• How satisfied were you with the coaching you received from the community nurse of your team?</li> </ul>                                                                           |
| Context                    | <ul style="list-style-type: none"> <li>• Did you experience any barriers in encouraging functional activities of older adults?<br/>If yes, what were these barriers?</li> </ul>                                            |
| <b>Topics</b>              | <b>Examples of questions from the interviews with older adults and their informal caregivers</b>                                                                                                                           |
| Fidelity                   | <ul style="list-style-type: none"> <li>• Did the nurses encourage you to perform functional activities independent?<br/>If yes, can you amplify your answer?</li> </ul>                                                    |
| Dose received satisfaction | <ul style="list-style-type: none"> <li>• How satisfied were you with how the nurses encouraged you (or did not encourage you) to independently perform functional activities?</li> </ul>                                   |
| Context                    | <ul style="list-style-type: none"> <li>• Did you experience any barriers in independently performing functional activities?<br/>If yes, what were these barriers?</li> </ul>                                               |
