# Supplementary material for: Process evaluation of a programme to empower community nurse leadership
Source: PubMed Central journal article supplement (PMC8273989; doi:10.1186/s12912-021-00650-y), 2021-07-12
Supplement: 12912_2021_650_MOESM2_ESM.pdf [file 12912_2021_650_MOESM2_ESM.pdf]

## Additional file 2. Example of the checklist for reviewing the implementation plans

| Name<br><div style="border: 1px solid black; width: 100px; height: 20px; margin-top: 5px;"></div>                                                         | Requirements                                                                                       | Yes No |   | Comments                            |
|-----------------------------------------------------------------------------------------------------------------------------------------------------------|----------------------------------------------------------------------------------------------------|--------|---|-------------------------------------|
|                                                                                                                                                           |                                                                                                    |        |   |                                     |
| <b>Step 1: Formulate a proposal for change and SMART (Specific, Measurable, Attainable, Relevant, Time-Bound) goals.</b>                                  | A. Has it described what must change? ( <i>A</i> )                                                 | X      |   |                                     |
|                                                                                                                                                           | B. Has it described how much must change? ( <i>B</i> )                                             | X      |   |                                     |
|                                                                                                                                                           | C. Has it described who must change? ( <i>C</i> )                                                  | X      |   |                                     |
|                                                                                                                                                           | D. Has it described when the change must occur? ( <i>D</i> )                                       | X      |   |                                     |
|                                                                                                                                                           | E. Has a SMART goal been formulated based on A, B, C and D?                                        | X      |   |                                     |
| <b>Step 2: Assess the performance of professionals in encouraging functional activities and related barrier and formulating SMART targets for change.</b> | A. Has the MAINtain-C questionnaire been administered?                                             | X      |   | The goals are not formulated SMART. |
|                                                                                                                                                           | B. Has the Excel tool been completed?                                                              | X      |   |                                     |
|                                                                                                                                                           | C. Has it described the current performance of professionals in encouraging functional activities? | X      |   |                                     |
|                                                                                                                                                           | D. Has it described the barriers of professionals in encouraging functional activities?            | X      |   |                                     |
|                                                                                                                                                           | E. Have SMART goals been formulated based on current performance and barriers?                     |        | X |                                     |
| <b>Step 3: Select and tailor strategies.</b>                                                                                                              | A. Have the implementation strategies been described?                                              | X      |   |                                     |
|                                                                                                                                                           | B. Has it described how the strategies are tailored to the barriers?                               | X      |   |                                     |
|                                                                                                                                                           | C. Has it described who is responsible for executing the strategies?                               | X      |   |                                     |
| <b>Step 4: Plan the implementation process.</b>                                                                                                           | A. Has it described who is going to execute the implementation of the strategies in practice?      | X      |   |                                     |
|                                                                                                                                                           | B. Has it described who is involved during the implementation?                                     | X      |   |                                     |
|                                                                                                                                                           | C. Has it described how much and when the strategies are executed?                                 | X      |   |                                     |
| <b>Step 5: Integrate the improvement within practice.</b>                                                                                                 | A. Has it described which actions need to ensure that the change is secured?                       | X      |   |                                     |
|                                                                                                                                                           | B. Has it specifically described who is executing these actions and when?                          | X      |   |                                     |
| <b>Step 6: Evaluate and revise the plan.</b>                                                                                                              | A. Has it described which actions are undertaken to evaluate the implementation process?           | X      |   |                                     |
|                                                                                                                                                           | B. Has it specifically described who is executing these actions and when?                          | X      |   |                                     |
