# Supplementary material for: Process evaluation of a programme to empower community nurse leadership
Source: PubMed Central journal article supplement (PMC8273989; doi:10.1186/s12912-021-00650-y), 2021-07-12
Supplement: 12912_2021_650_MOESM3_ESM.pdf [file 12912_2021_650_MOESM3_ESM.pdf]

### Additional file 3. Example of the checklist for the review of patient records

| Patient number: X         |                                                                                                                                                                       |                                                                                                                                     |           |                                                                                                                                                                                       |                                                                                                                                                                                                                                 |           |
|---------------------------|-----------------------------------------------------------------------------------------------------------------------------------------------------------------------|-------------------------------------------------------------------------------------------------------------------------------------|-----------|---------------------------------------------------------------------------------------------------------------------------------------------------------------------------------------|---------------------------------------------------------------------------------------------------------------------------------------------------------------------------------------------------------------------------------|-----------|
|                           | <i>Are the diagnoses, outcomes or interventions related to encouraging functional activities (ADL, IADL, general activities*) reported within the patient record?</i> |                                                                                                                                     |           | <i>Are the diagnoses, outcomes or interventions, related to encouraging functional activities (ADL, IADL, general activities*) reported within the patient record, also reported?</i> |                                                                                                                                                                                                                                 |           |
| <b>Nursing process</b>    | <b>Yes</b>                                                                                                                                                            | <b>Description</b>                                                                                                                  | <b>No</b> | <b>Yes</b>                                                                                                                                                                            | <b>Description</b>                                                                                                                                                                                                              | <b>No</b> |
| <b>ADL</b>                |                                                                                                                                                                       |                                                                                                                                     |           |                                                                                                                                                                                       |                                                                                                                                                                                                                                 |           |
| Diagnose                  |                                                                                                                                                                       |                                                                                                                                     | X         |                                                                                                                                                                                       |                                                                                                                                                                                                                                 | X         |
| Outcome                   | X                                                                                                                                                                     | Within two months, Mr X is able to independently put on and take off his compression stockings with the use of an assistive device. |           | X                                                                                                                                                                                     | ‘Mr X did put on his compression stockings this morning, it went well’.<br>‘Mr X still needs small steering but has put on the stockings completely independent’.<br>‘Mr X is satisfied with the assistive device and its use’. |           |
| Intervention              |                                                                                                                                                                       |                                                                                                                                     | X         |                                                                                                                                                                                       |                                                                                                                                                                                                                                 | X         |
| <b>IADL</b>               |                                                                                                                                                                       |                                                                                                                                     |           |                                                                                                                                                                                       |                                                                                                                                                                                                                                 |           |
| Diagnose                  |                                                                                                                                                                       |                                                                                                                                     | X         |                                                                                                                                                                                       |                                                                                                                                                                                                                                 | X         |
| Outcome                   |                                                                                                                                                                       |                                                                                                                                     | X         |                                                                                                                                                                                       |                                                                                                                                                                                                                                 | X         |
| Intervention              |                                                                                                                                                                       |                                                                                                                                     | X         |                                                                                                                                                                                       |                                                                                                                                                                                                                                 | X         |
| <b>General activities</b> |                                                                                                                                                                       |                                                                                                                                     |           |                                                                                                                                                                                       |                                                                                                                                                                                                                                 |           |
| Diagnose                  |                                                                                                                                                                       |                                                                                                                                     | X         |                                                                                                                                                                                       |                                                                                                                                                                                                                                 | X         |
| Outcome                   |                                                                                                                                                                       |                                                                                                                                     | X         |                                                                                                                                                                                       |                                                                                                                                                                                                                                 | X         |
| Intervention              |                                                                                                                                                                       |                                                                                                                                     | X         |                                                                                                                                                                                       |                                                                                                                                                                                                                                 | X         |

*\*We followed the clustering of the ADL (e.g. using the toilet) and IADL (e.g. preparing breakfast) as presented in the Groningen Activity Restriction Scale (GARS) developed to measure disability (28). For the definition of general activities (e.g. discussing with clients which activities they can still perform), we followed the activities as presented in the MAINtAIN-C Behaviours scale (15).*
